# Supplementary material
Source: Springer Nature journal article supplement (https://www.springermedizin.de/resource/supplementary/13054_2010_8813_MOESM3_ESM.pdf/9732632)

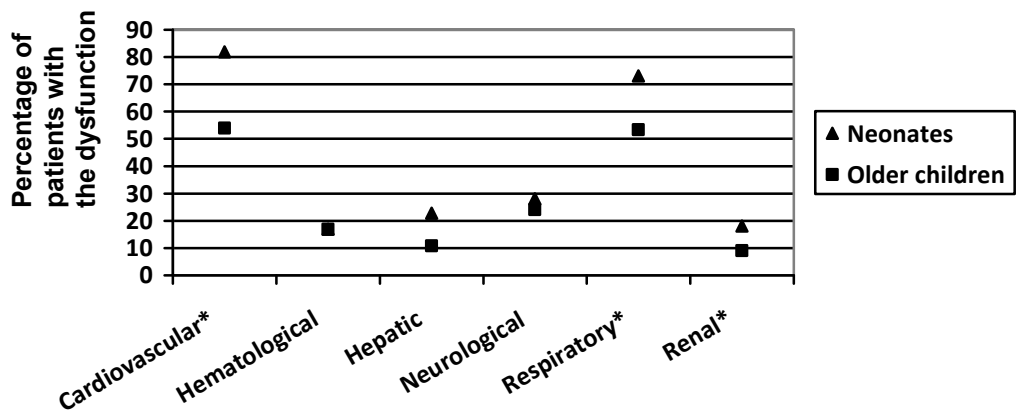

Supplement: MOESM3 [file 9732632]
